# Supplementary material
Source: PubMed Central journal article supplement (PMC3035102)
Supplement: NIHMS262490-supplement-3_si_003.pdf [file NIHMS262490-supplement-3_si_003.pdf]

**Supplemental figure 2** – Clustal alignment of members of the Hemolectin family protein. The *D. maxima* protein is indicated by Dm-385. The remaining sequences are named with the first three letters from the genus name followed by two letters from the species name and by their NCBI protein accession number. Only the carboxy-terminal region is shown. The symbols above the alignment indicate: (\*) identical sites; (:) conserved sites; (.) less conserved sites.

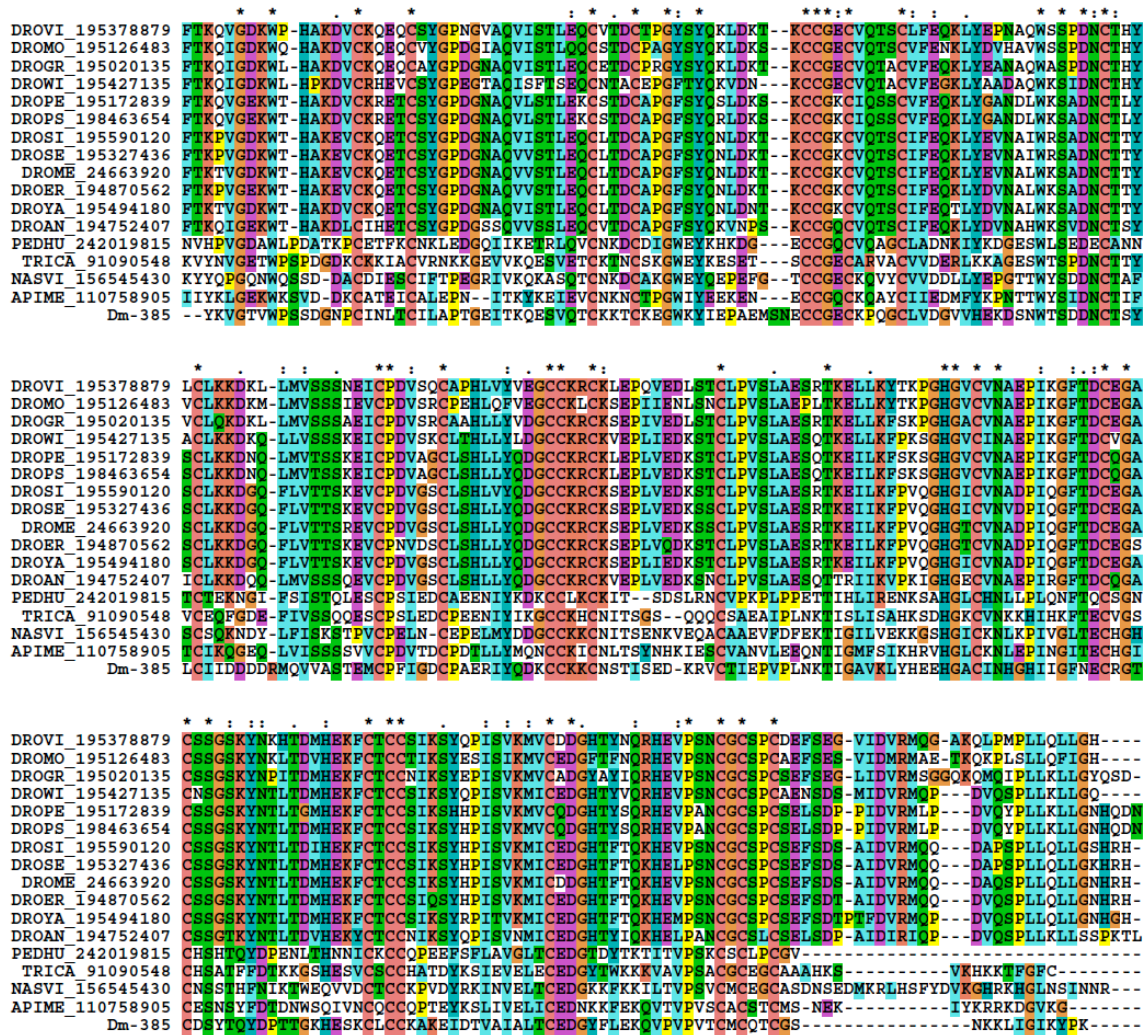



**Supplemental figure 4 – Clustal alignment of a predicted sequence from a contig of *D. maxima***

library that showed similarity to a larval cuticle protein. The thick bar indicates the chitin-binding domain region. The symbols above the alignment indicate: (\*) identical sites; (: ) conserved sites; (.) less conserved sites.

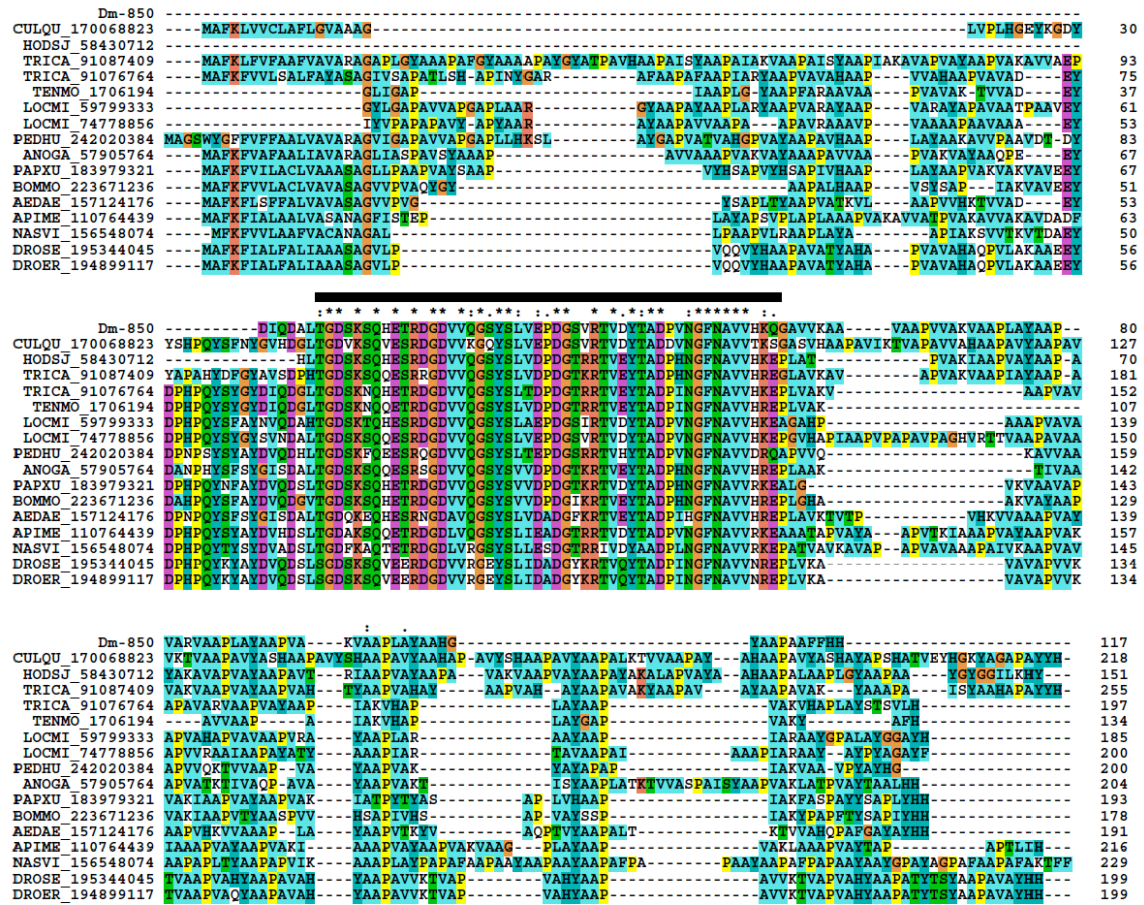

**Supplemental Table 1.** Identification of Proteins of *Dipetalogaster maxima* Saliva by Peptide Mass Fingerprinting

| Spot <sup>a</sup> | Identity <sup>b</sup> | Accession number<br>(cDNA library) <sup>c</sup> | Score <sup>d</sup> | Coverage<br>(%) <sup>e</sup> | Mol. Mass (kDa) <sup>f</sup> |        | Isoelectric Point <sup>g</sup> |        |
|-------------------|-----------------------|-------------------------------------------------|--------------------|------------------------------|------------------------------|--------|--------------------------------|--------|
|                   |                       |                                                 |                    |                              | Exp.                         | Theor. | Exp.                           | Theor. |
| 1                 | Apyrase               | Dm-68                                           | 74 > 48            | 31                           | 94.4                         | 25.0   | 4.8                            | 4.8    |
| 2                 | Apyrase               | Dm-68                                           | 53 > 48            | 17                           | 94.0                         | 25.0   | 5.0                            | 4.8    |
| 3                 | Apyrase               | Dm-68                                           | 70 > 48            | 26                           | 95.7                         | 25.0   | 5.1                            | 4.8    |
| 4                 | Apyrase               | Dm-68                                           | 49 > 48            | 16                           | 95.0                         | 25.0   | 5.2                            | 4.8    |
| 5                 | Lipocalin             | Dm-96                                           | 68 > 48            | 28                           | 83.1                         | 17.7   | 7.6                            | 5.2    |
| 6                 | Lipocalin             | Dm-96                                           | 51 > 48            | 25                           | 53.5                         | 17.7   | 5.0                            | 5.2    |
| 7                 | Lipocalin             | Dm-105                                          | 84 > 48            | 42                           | 44.6                         | 16.0   | 5.9                            | 5.4    |
| 8                 | Lipocalin             | Dm-45                                           | 60 > 48            | 24                           | 43.3                         | 19.8   | 6.6                            | 6.9    |
| 9                 | Lipocalin             | Dm-272                                          | 95 > 48            | 46                           | 42.5                         | 17.6   | 8.4                            | 7.7    |
| 10                | Lipocalin             | Dm-270                                          | 77 > 48            | 29                           | 40.0                         | 17.3   | 8.4                            | 7.7    |
| 11                | Lipocalin             | Dm-270                                          | 129 > 48           | 50                           | 38.5                         | 17.3   | 8.4                            | 7.7    |
| 12                | Lipocalin             | Dm-96                                           | 61 > 48            | 31                           | 33.6                         | 17.7   | 5.0                            | 5.2    |
| 13                | Antigen-5             | Dm-124                                          | 53 > 48            | 18                           | 31.1                         | 28.3   | 8.4                            | 8.6    |
| 14                | Antigen-5             | Dm-124                                          | 88 > 48            | 38                           | 31.4                         | 28.3   | 8.6                            | 8.7    |
| 15                | Antigen-5             | Dm-124                                          | 136 > 48           | 38                           | 30.4                         | 28.3   | 8.2                            | 8.6    |
| 16                | Antigen-5             | Dm-124                                          | 58 > 48            | 14                           | 30.4                         | 28.3   | 8.4                            | 8.6    |
| 17                | Antigen-5             | Dm-79                                           | 80 > 48            | 46                           | 30.0                         | 21.2   | 8.6                            | 8.5    |
| 18                | Lipocalin             | Dm-105                                          | 60 > 48            | 28                           | 28.7                         | 16.0   | 5.9                            | 5.4    |
| 19                | Lipocalin             | Dm-75                                           | 58 > 48            | 34                           | 27.3                         | 14.9   | 5.9                            | 5.2    |
| 20                | Lipocalin             | Dm-78                                           | 90 > 48            | 31                           | 25.7                         | 18.1   | 7.0                            | 6.6    |

| Spot <sup>a</sup> | Identity <sup>b</sup>   | Accession number (cDNA library) <sup>c</sup> | Score <sup>d</sup> | Coverage (%) <sup>e</sup> | Mol. Mass (kDa) <sup>f</sup> |              | Isoelectric Point <sup>g</sup> |            |
|-------------------|-------------------------|----------------------------------------------|--------------------|---------------------------|------------------------------|--------------|--------------------------------|------------|
|                   |                         |                                              |                    |                           | Exp.                         | Theor.       | Exp.                           | Theor.     |
| 21                | Lipocalin               | Dm-99                                        | 97 > 48            | 48                        | 25.7                         | 14.3         | 9.4                            | 8.9        |
| 22 Mixture        | Lipocalin               | Dm-1189<br>Dm-288                            | 196 > 48           | 77<br>36                  | 25.0                         | 11.4<br>21.4 | 9.5                            | 9.6<br>7.5 |
| 23                | Pallidipin              | Dm-1049                                      | 72 > 48            | 40                        | 24.6                         | 20.3         | 6.8                            | 6.5        |
| 24                | Pallidipin              | Dm-1049                                      | 66 > 48            | 33                        | 24.1                         | 20.3         | 7.0                            | 6.5        |
| 25                | Pallidipin              | Dm-1049                                      | 85 > 48            | 32                        | 24.3                         | 20.3         | 7.2                            | 6.5        |
| 26                | Unknown                 | M_ASB-722_FR2                                | 52 > 48            | 13                        | 24.2                         | 31.8         | 8.4                            | 10.4       |
| 27                | Lipocalin               | Dm-346                                       | 118 > 48           | 47                        | 23.8                         | 20.2         | 8.8                            | 8.7        |
| 28 Mixture        | Pallidipin<br>Lipocalin | M_ASB-1047_FR1<br>Dm-78                      | 116 > 48           | 18<br>26                  | 23.0                         | 39.4<br>18.1 | 7.0                            | 9.9<br>6.6 |
| 29                | Lipocalin               | Dm-49                                        | 261 > 48           | 68                        | 23.0                         | 20.2         | 8.4                            | 8.1        |
| 30                | Lipocalin               | Dm-346                                       | 70 > 48            | 35                        | 22.5                         | 20.2         | 8.8                            | 8.7        |
| 31                | Lipocalin               | Dm-240                                       | 65 > 48            | 28                        | 22.0                         | 17.9         | 6.7                            | 7.0        |
| 32                | Lipocalin               | Dm-270                                       | 175 > 48           | 43                        | 21.5                         | 17.3         | 8.5                            | 7.7        |
| 33                | Lipocalin               | Dm-270                                       | 95 > 48            | 26                        | 21.5                         | 17.3         | 8.8                            | 7.7        |
| 34                | Lipocalin               | Dm-96                                        | 70 > 48            | 35                        | 22.1                         | 17.7         | 5.0                            | 5.2        |
| 35                | Lipocalin               | Dm-270                                       | 122 > 48           | 43                        | 21.2                         | 17.3         | 7.7                            | 7.7        |
| 36                | Lipocalin               | Dm-96                                        | 64 > 48            | 40                        | 20.6                         | 17.7         | 5.0                            | 5.2        |
| 37                | Lipocalin               | Dm-96                                        | 89 > 48            | 40                        | 20.7                         | 17.7         | 5.3                            | 5.2        |
| 38                | Lipocalin               | Dm-171                                       | 68 > 48            | 36                        | 20.3                         | 8.2          | 6.2                            | 8.6        |
| 39 Mixture        | Lipocalin               | Dm-278<br>Dm-78                              | 102 > 48           | 28<br>26                  | 20.4                         | 16.3<br>18.0 | 7.0                            | 5.6<br>6.6 |
| 40 Mixture        | Lipocalin               | Dm-237<br>Dm-278                             | 158 > 48           | 42<br>37                  | 20.0                         | 15.2<br>16.3 | 7.7                            | 6.1<br>5.6 |

| Spot <sup>a</sup> | Identity <sup>b</sup> | Accession number<br>(cDNA library) <sup>c</sup> | Score <sup>d</sup> | Coverage<br>(%) <sup>e</sup> | Mol. Mass (kDa) <sup>f</sup> |        | Isoelectric Point <sup>g</sup> |        |
|-------------------|-----------------------|-------------------------------------------------|--------------------|------------------------------|------------------------------|--------|--------------------------------|--------|
|                   |                       |                                                 |                    |                              | Exp.                         | Theor. | Exp.                           | Theor. |
| 41 Mixture        | Lipocalin             | Dm-270                                          | 131 >48            | 45                           | 20.3                         | 17.3   | 8.8                            | 7.7    |
|                   |                       | Dm-346                                          |                    | 40                           |                              | 20.1   |                                | 8.7    |
| 42                | Lipocalin             | Dm-96                                           | 69 > 48            | 33                           | 19.7                         | 17.7   | 5.0                            | 5.2    |
| 43                | Lipocalin             | Dm-270                                          | 124 >48            | 49                           | 18.8                         | 17.3   | 7.7                            | 7.7    |
| 44                | Lipocalin             | Dm-272                                          | 139 >48            | 46                           | 19.4                         | 17.6   | 8.4                            | 7.7    |
| 45 Mixture        | Lipocalin             | Dm-278                                          | 123 >48            | 32                           | 19.8                         | 16.3   | 8.8                            | 5.6    |
|                   |                       | Dm-258                                          |                    | 27                           |                              | 17.7   |                                | 7.7    |
| 46                | Lipocalin             | Dm-270                                          | 93 > 48            | 26                           | 19.5                         | 17.3   | 9.5                            | 7.7    |
| 47                | Lipocalin             | Dm-278                                          | 94 > 48            | 36                           | 19.1                         | 16.4   | 9.8                            | 5.6    |

<sup>a</sup> Spot numbers are indicated in Figure 2.

<sup>b</sup> Results obtained by MASCOT software against partial predicted proteins library.

<sup>c</sup> Accession number in predicted proteins library.

<sup>d</sup> Probability-based Mowse score of MASCOT software. The numbers after the symbol ">" represent the minimum statistically significant score calculated by the software.

<sup>e</sup> Percentage of predicted protein sequences covered by matched peptides via MASCOT.

<sup>f</sup> Experimental and theoretical molecular masses of proteins visualized on gels and calculated from amino acid sequences, respectively.
